# Supplementary material for: Interplay between TETs and microRNAs in the adult brain for memory formation
Source: PubMed Central journal article supplement (PMC5786039; doi:10.1038/s41598-018-19806-z), 2018-01-26
Supplement: 41598_2018_19806_MOESM1_ESM.pdf [file 41598_2018_19806_MOESM1_ESM.pdf]

# **Supporting Information**

## **Interplay between TETs and microRNAs in the adult brain for memory formation**

**Eloïse A. Kremer, Niharika Gaur, Melissa A. Lee, Olivia Engmann, Johannes Bohacek, and Isabelle M. Mansuy**

## SUPPLEMENTARY FIGURES

## Supplementary Figure S1

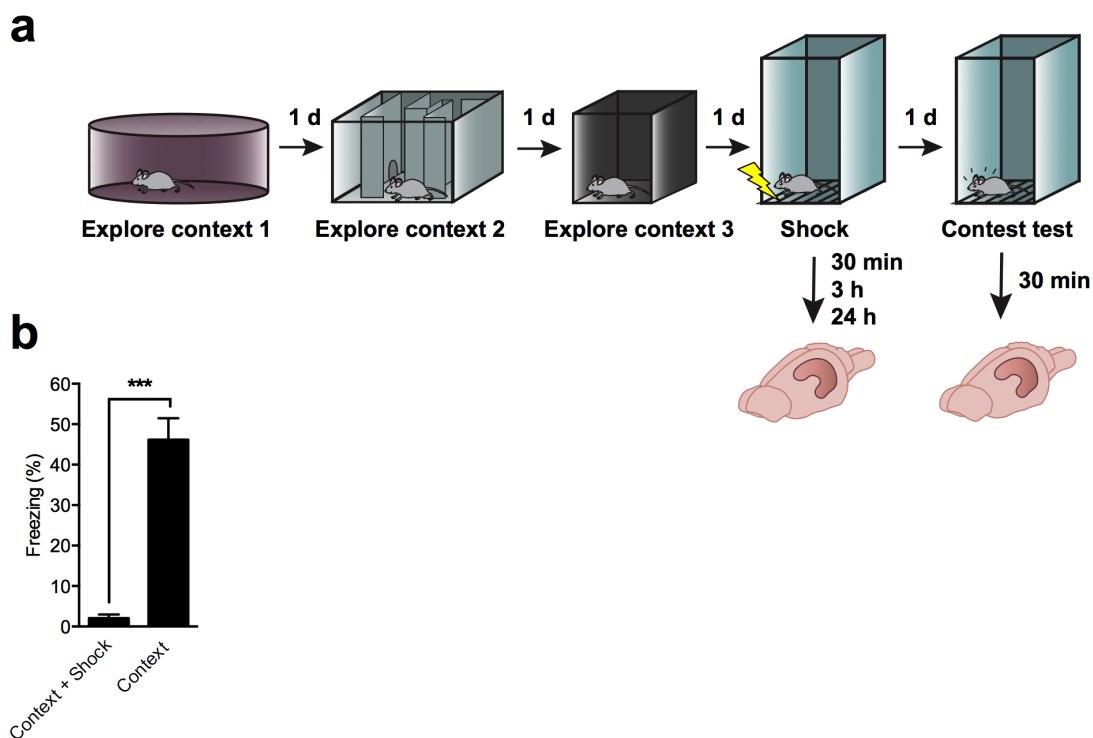**Supplementary Fig. S1. Contextual fear conditioning paradigm**

(a) During habituation, a mouse was familiarized to an environment different from the home cage (context 1, 2 and 3) and was then placed in a novel context, where it receives 3 electric footshocks. After 24h, the animal was placed back in the context without any shock. The freezing response was measured as an indicator of fear memory. (b) Left bar shows baseline freezing before delivery of the foot shock, right bar shows freezing during context test (24h after conditioning). \*\*\* $p \leq 0.001$  determined by unpaired t test. Data represent mean  $\pm$  s.e.m.

## Supplementary Figure S2

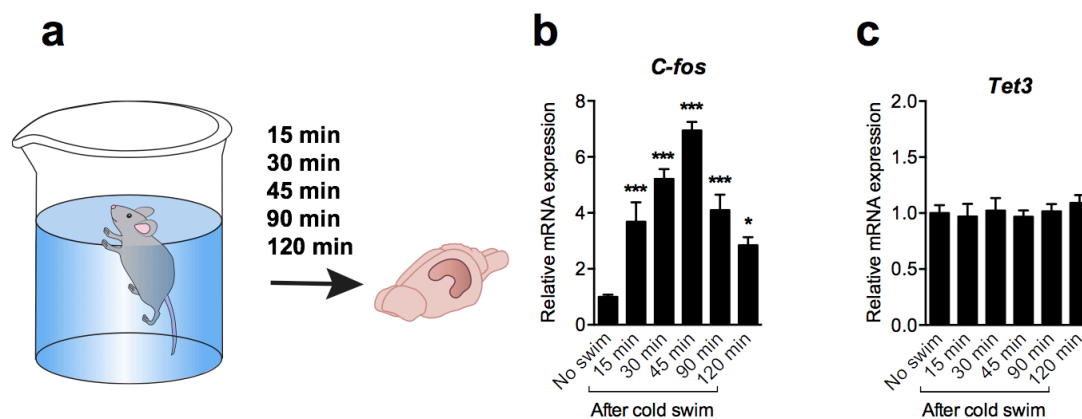

### Supplementary Fig. S2. *Tet3* is not responsive to stress

(a) Mice were placed in a small tank of water filled with cold water for 6 min and sacrificed 15, 30, 90, 120 min later. (b) Level of hippocampal *C-fos* transcripts after subjection to cold swim measured by RT-qPCR. \* $p < 0.05$ , \*\*\* $p \leq 0.001$  determined by one-way ANOVA followed by Dunnett's post-hoc test (c) Level of hippocampal *Tet3* transcripts after subjection to cold swim measured by RT-qPCR. Data represent mean  $\pm$  s.e.m.

## Supplementary Figure S3

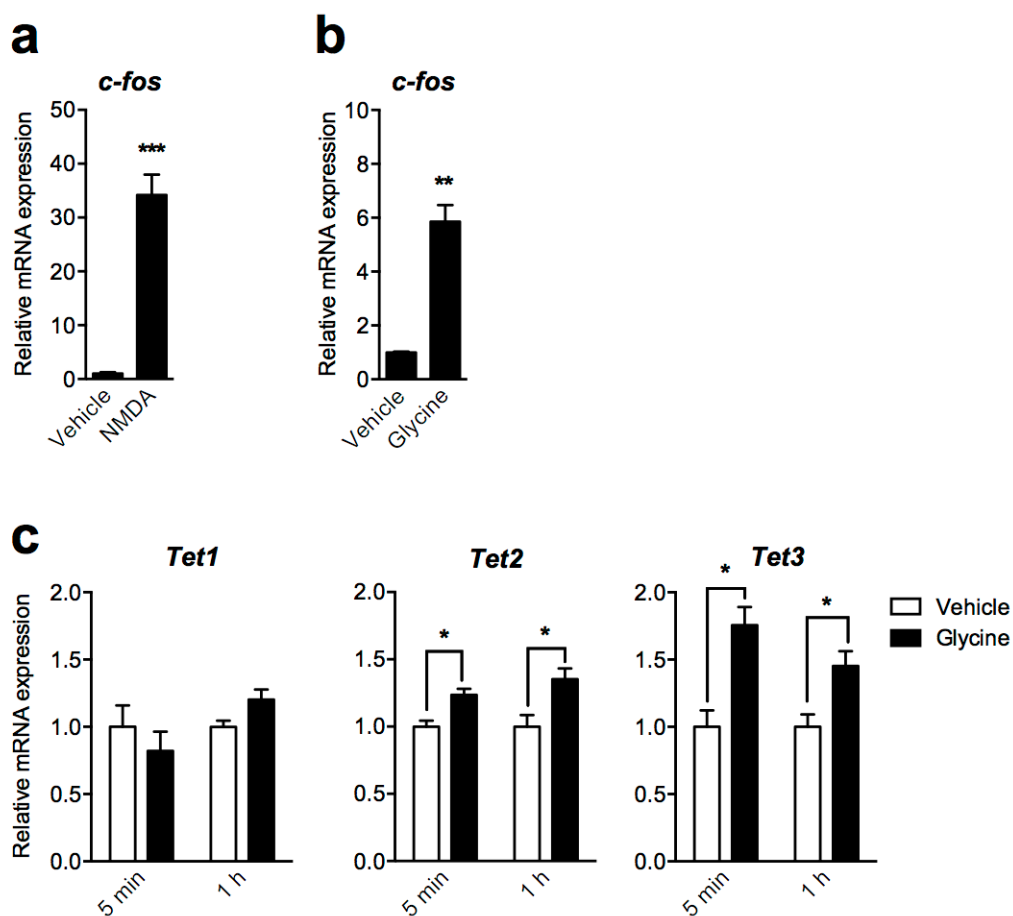

**Supplementary Fig. S3. *Tet3* is responsive to activation of NMDA receptors with glycine**

(a) Level of *C-fos* in hippocampal primary neurons 1h after NMDA stimulation measured by RT-qPCR. \*\*\* $p < 0.001$  determined by unpaired t test (b) Level of *C-fos* in hippocampal primary neurons 1h after glycine stimulation measured by RT-qPCR. \*\* $p < 0.01$  determined by unpaired t test (c) Level of *Tet1*, 2, and 3 in hippocampal primary neurons 5 min and 1h after glycine stimulation measured by RT-qPCR. \* $p < 0.05$  determined by unpaired t test . Data represent mean  $\pm$  s.e.m.

## Supplementary Figure S4

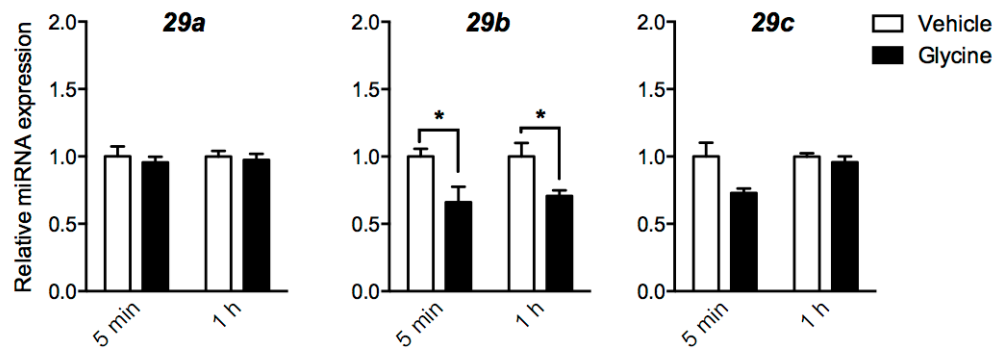

### Supplementary Fig. S4. Activation of NMDA receptors with glycine leads to decreased miR-29b expression.

Level of *miR-29 a, b, and c* in hippocampal primary neurons 5 min and 1h after glycine stimulation measured by RT-qPCR. \* $p < 0.05$  determined by unpaired t test. Data represent mean  $\pm$  s.e.m.

## Supplementary Figure S5

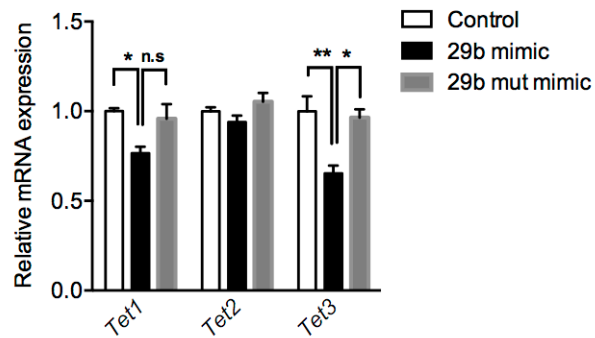

### Supplementary Fig. S5. Seed mutant miR-29b mimic does not have an effect on the expression of *Tets*.

Level of *Tet1*, *Tet2*, and *Tet3* in N2a cells after transfection with miR-29b mimic, seed mutant miR-29b mimic or control measured by RT-qPCR. \* $p < 0.05$ , \*\* $p < 0.01$  determined by one-way ANOVA followed by Tukey's post-hoc test. Data represent mean  $\pm$  s.e.m.

## Supplementary Figure S6

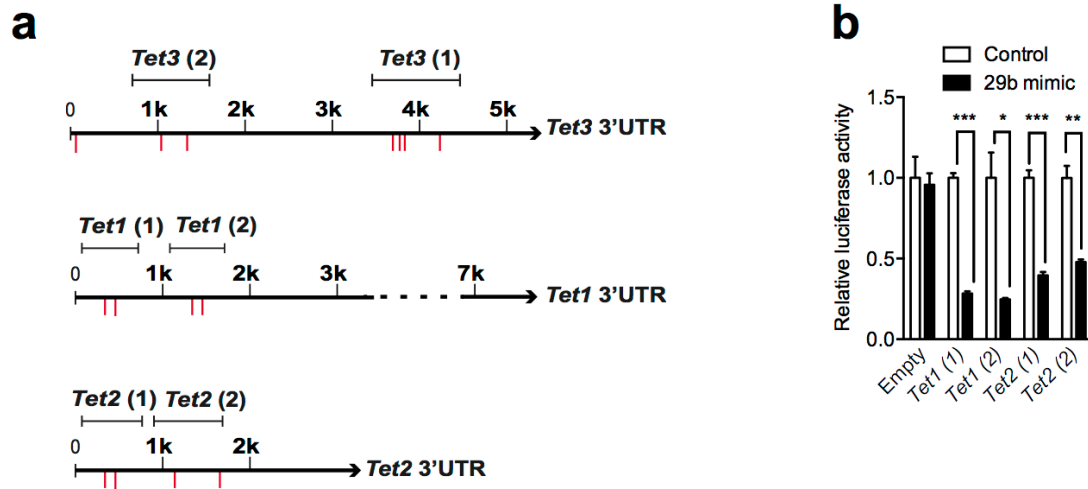

**Supplementary Fig. S6. MiR-29b binds to *Tet1* and *Tet2* 3' UTRs and control their expression.**

(a) Segments of *Tet1*, *Tet2* and *Tet3* 3'UTRs were cloned into a luciferase reporter; each segment contains conserved seed sequences (indicated in red) for the miR-29 family as predicted by TargetScan<sup>1</sup> (Supplementary Table S1). (b) Analysis of *Tet1* and *Tet2* luciferase reporters in the presence of miR-29b mimic or control (40 nM) in N2a cells. \* $p < 0.05$ , \*\* $p < 0.01$ , \*\*\* $p < 0.001$  determined by unpaired t test. Data represent mean  $\pm$  s.e.m.

## Supplementary Figure S7

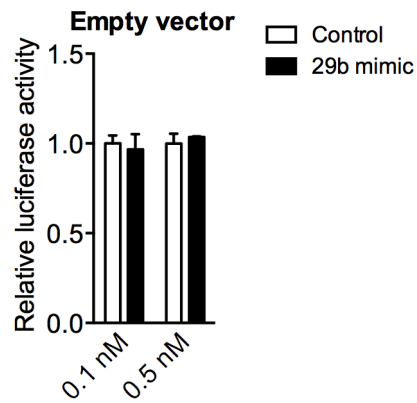

**Supplementary Fig. S7. Luciferase activity of empty vector is stable in the presence of miR-29b or control.**

Analysis of the luciferase activity in N2a cells transfected with empty vector in the presence of graded concentrations of miR-29b mimic or control. Data represent mean  $\pm$  s.e.m.



## Supplementary Figure S8

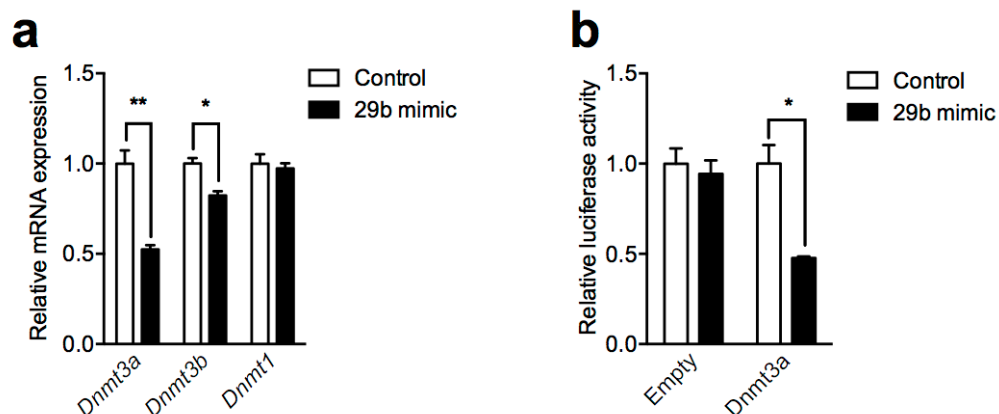

### Supplementary Fig. S8. MiR-29b targets *Dnmt3a* and *-b*.

(a) Level of *Dnmt3a*, *-b* and *1* in N2a cells 24h after transfection with 29b mimic or control measured by RT-qPCR. \* $p < 0.05$ , \*\* $p < 0.01$  determined by unpaired t test (b) Analysis of *Dnmt3a* luciferase reporter in the presence of miR-29b mimic or control (60 nM) in N2a cells. \* $p < 0.05$  determined by unpaired t test Data represent mean  $\pm$  s.e.m.

## Supplementary Figure S9

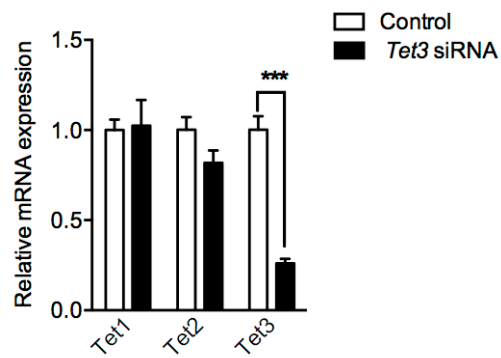

**Supplementary Fig. S9. Knockdown of *Tet3* selectively reduces *Tet3* mRNA level.**

Level of *Tet1*, *Tet2*, and *Tet3* in N2a cells after transfection with a pool of siRNAs directed against *Tet3* or control measured by RT-qPCR. \*\*\* $p < 0.001$  determined by unpaired t test. Data represent mean  $\pm$  s.e.m.

## Supplementary Figure S10

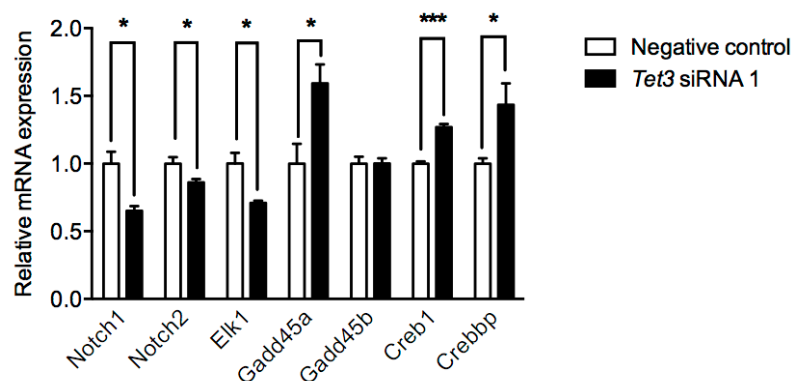

**Supplementary Fig. S10. Knockdown of *Tet3* using a single siRNA alters the expression of synaptic and memory-related genes.**

Transcriptional analysis of genes involved in synaptic plasticity, memory formation after *Tet3* knockdown in N2a cells by RT-qPCR. \* $p < 0.05$ , \*\*\* $p < 0.001$  determined by unpaired t test. Data represent mean  $\pm$  s.e.m.

## Supplementary Figure S11

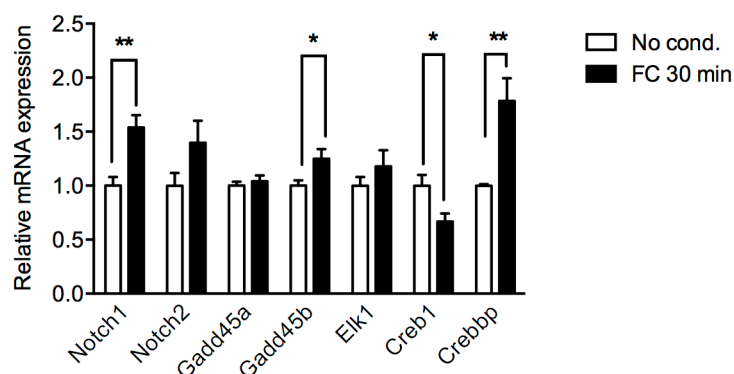

### Supplementary Fig. S11. mRNA expression level of synaptic and memory-related genes in response to fear conditioning.

Level of identified *Tet3* targets in the hippocampus 30 min after fear conditioning, measured by RT-qPCR. \* $p < 0.05$ , \*\* $p < 0.01$  determined by unpaired t test. Data represent mean  $\pm$  s.e.m.

## Supplementary Figure S12

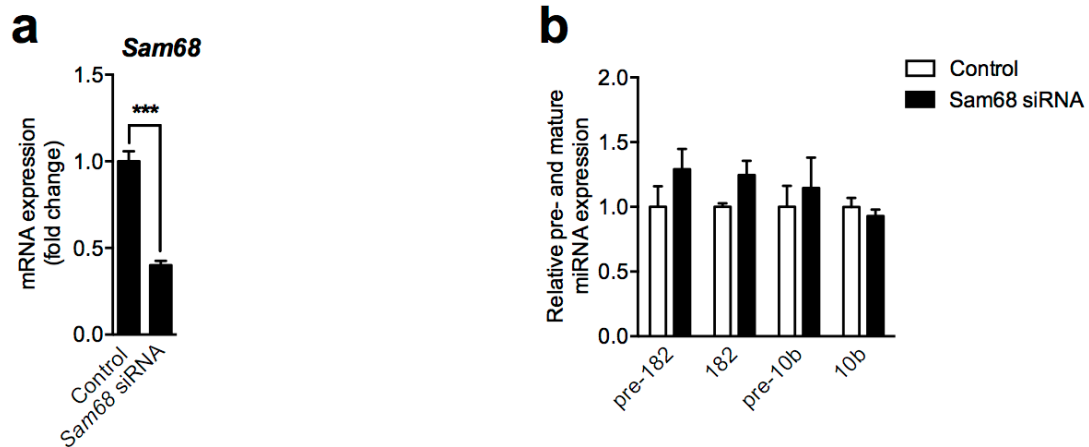

### Supplementary Fig. S12. Knockdown of *Sam68* does not alter precursor and mature miR-182 and miR-10b expression level.

(a) Level of *Sam68* in N2a cells after transfection with a pool of siRNAs directed against *Sam68* or control measured by RT-qPCR. \*\*\* $p < 0.001$  determined by unpaired t test. (b) Level of precursor and mature miR-182 and miR-10b after transfection with a pool of siRNAs directed to *Sam68* or control measured by RT-qPCR. Data represent mean  $\pm$  s.e.m.

## Supplementary Figure S13

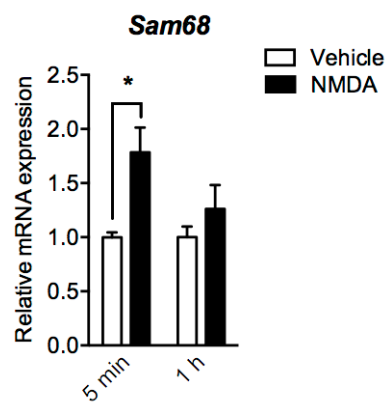

### Supplementary Fig. S13. *Sam68* expression is activity-dependent.

Level of *Sam68* in hippocampal primary neurons 5 min and 1 h after NMDA stimulation (60  $\mu$ M, 5 min) measured by RT-qPCR. \* $p$ <0.05 determined by unpaired t test. Data represent mean  $\pm$  s.e.m.

## Supplementary Figure S14

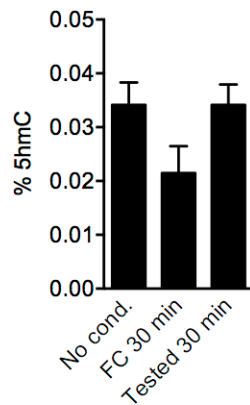

### Supplementary Fig. S14. Global 5-hmC is not altered in the hippocampus after fear conditioning

Level of 5-hmC in the hippocampus 30 min after training and 30 min after testing as measured by ELISA. Data represent mean  $\pm$  s.e.m.

## Supplementary Figure S15

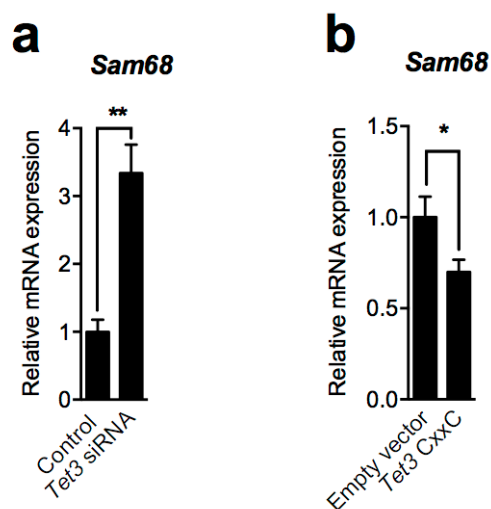

### Supplementary Fig. S15. *Sam68* expression is sensitive to TET3 levels.

(a) Level of *Sam68* in N2a cells after transfection with a pool of siRNAs directed against *Tet3* or control measured by RT-qPCR. \*\* $p < 0.01$  determined by unpaired t test (b) Level of *Sam68* in N2a cells after transfection with a plasmid expressing *Tet3* containing the CxxC DNA-binding domain or empty vector measured by RT-qPCR. \* $p < 0.05$  determined by unpaired t test. Data represent mean  $\pm$  s.e.m.



## Supplementary Figure S16

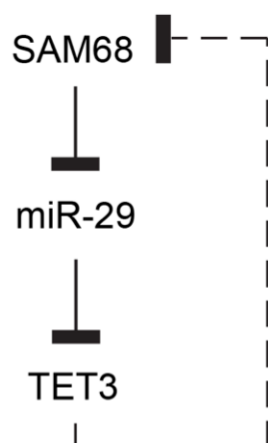

### Supplementary Fig. S16. Model for the regulation of *Tet3* via miR-29b and SAM68.

SAM68 inhibits miR-29b transcription, leading to reduced mature miR-29 levels, thus allowing *Tet3* transcripts to increase. TET3 likely inhibits *Sam68* expression by binding to its promoter, thus allowing transient *Tet3* expression in response to neuronal activity.

**Supplementary Figure S17**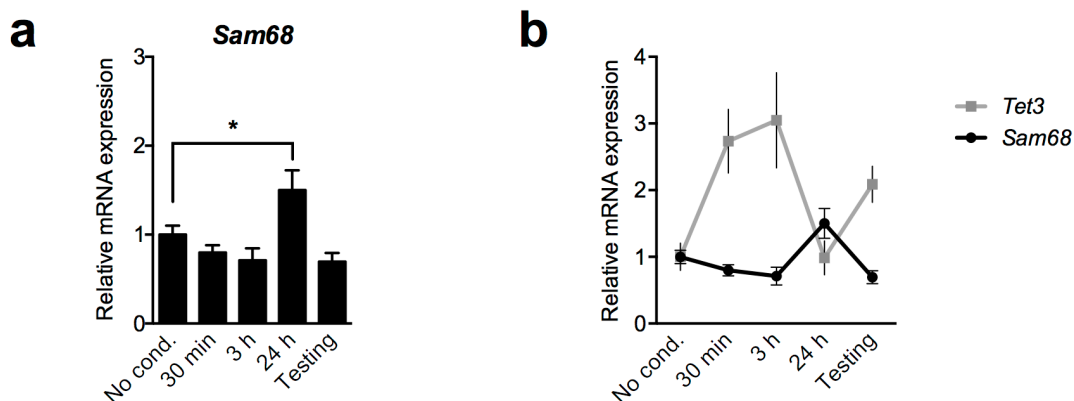**Supplementary Fig. S17. *Sam68* expression is altered in the hippocampus in response to fear conditioning.**

(a) Level of *Sam68* in the hippocampus 30 min, 3 h, 24 h after fear conditioning, or 30 min after testing 24 h following conditioning, measured by RT-qPCR. No cond., no conditioning. \* $p < 0.05$  determined by one-way ANOVA followed by Dunnett's post-hoc test. (b) Superposition of the data depicted in Fig. 1a and Fig. S19a. *Tet3* and *Sam68* levels are negatively correlated, suggesting the presence of a negative feedback loop. It should be noted samples were collected at consistent time points and do not permit to resolve a delay in this putative feedback reaction, which would be expected if TET3 proteins regulate *Sam68* expression at the transcriptional level.

**SUPPLEMENTARY TABLES**

| <b>3'UTR</b>       | <b>Site position</b> | <b>Seed position</b> | <b>Seed type</b> | <b>P<sub>CT</sub></b> |
|--------------------|----------------------|----------------------|------------------|-----------------------|
| <b><i>Tet3</i></b> | 42-57                | 51-57                | 7mer-m8          | 0.83                  |
|                    | 1032-1039            | 1032-1038            | 7mer-m8          | 0.82                  |
|                    | 1358-1373            | 1367-1373            | 7mer-m8          | 0.73                  |
|                    | 3680-3706            | 3699-3705            | 8mer             | 0.89                  |
|                    | 3721-3753            | 3747-3752            | 7mer-A1          | 0.87                  |
|                    | 3807-3831            | 3824-3830            | 7mer-m8          | 0.73                  |
|                    | 4248-4265            | 4258-4264            | 8mer             | 0.85                  |
| <b><i>Tet1</i></b> | 297-322              | 316-322              | 7mer-m8          | 0.68                  |
|                    | 407-423              | 417-423              | 7mer-m8          | 0.89                  |
|                    | 1326-1359            | 1353-1358            | 7mer-A1          | 0.7                   |
|                    | 1399-1430            | 1424-1430            | 7mer-m8          | 0.89                  |
| <b><i>Tet2</i></b> | 367-405              | 398-404              | 7mer-m8          | 0.68                  |
|                    | 525-564              | 557-563              | 8mer             | 0.89                  |
|                    | 1032-1061            | 1055-1061            | 7mer-m8          | 0.7                   |
|                    | 1587-1621            | 1614-1620            | 8mer             | 0.89                  |

**Supplementary Table S1. Modified output table of TargetScanMouse analysis.**

List of complementary sites for miR-29s in the 3'UTR region of *Tet1*, 2 and 3 predicted by TargetScanMouse <sup>1</sup>. *Tet3* 3'UTR contains seven well-conserved miR-29s binding sites, while *Tet1* and *Tet2* has four only. The site position represents the distance (bp) between the stop codon and binding sites of miR-29b. The seed position represents the distance (bp) between the stop codon and binding sites of the seed sequence of miR-29b. P<sub>CT</sub> is defined as the probability of conserved targeting <sup>2</sup>.

| mmu-miR-29b-3p    |               |               |                            |             |             |
|-------------------|---------------|---------------|----------------------------|-------------|-------------|
|                   | Site position | Seed position | $\Delta G_{\text{hybrid}}$ | Site Access | Seed Access |
| <b>Tet3 3'UTR</b> | 42-57         | 51-57         | -22                        | 0.35        | 0.447       |
|                   | 963-994       | 989-994       | -18.8                      | 0.365       | 0.333       |
|                   | 982-1005      | 1000-1005     | -19.5                      | 0.33        | 0.202       |
|                   | 1010-1016     | 1010-1015     | -16.7                      | 0.294       | 0.325       |
|                   | 1013-1026     | 1019-1025     | -22.6                      | 0.262       | 0.17        |
|                   | 1032-1039     | 1032-1038     | -17.5                      | 0.198       | 0.225       |
|                   | 1148-1164     | 1159-1164     | -21.3                      | 0.477       | 0.291       |
|                   | 1310-1336     | 1331-1336     | -18.8                      | 0.476       | 0.314       |
|                   | 1358-1373     | 1367-1373     | -18.4                      | 0.391       | 0.386       |
|                   | 3062-3082     | 3077-3082     | -21.4                      | 0.455       | 0.447       |
|                   | 3327-3338     | 3332-3337     | -16.5                      | 0.481       | 0.291       |
|                   | 3680-3706     | 3699-3705     | -22.9                      | 0.509       | 0.344       |
|                   | 3721-3753     | 3747-3752     | -20.5                      | 0.58        | 0.365       |
|                   | 3807-3831     | 3824-3830     | -19.7                      | 0.301       | 0.286       |
|                   | 4069-4086     | 4080-4085     | -19.3                      | 0.447       | 0.47        |
|                   | 4178-4201     | 4195-4201     | -20.6                      | 0.452       | 0.432       |
|                   | 4205-4220     | 4215-4220     | -15.6                      | 0.311       | 0.406       |
| 4248-4265         | 4258-4264     | -23.1         | 0.278                      | 0.357       |             |
| <b>Tet1 3'UTR</b> | 6454-6490     | 6483-6489     | -25.7                      | 0.346       | 0.458       |
|                   | 407-423       | 417-423       | -20.4                      | 0.306       | 0.409       |
|                   | 79-96         | 90-95         | -18.3                      | 0.372       | 0.241       |
|                   | 2043-2082     | 2076-2082     | -19.1                      | 0.338       | 0.253       |
|                   | 297-322       | 316-322       | -18.1                      | 0.453       | 0.555       |
|                   | 1326-1359     | 1353-1358     | -21.5                      | 0.304       | 0.49        |
|                   | 1521-1537     | 1532-1537     | -19                        | 0.44        | 0.178       |
|                   | 1399-1430     | 1424-1430     | -21.7                      | 0.412       | 0.854       |
|                   | 5250-5275     | 5269-5275     | -22.5                      | 0.464       | 0.446       |
|                   | 6987-7004     | 6999-7004     | -20.6                      | 0.316       | 0.18        |
|                   | 4551-4581     | 4574-4580     | -24.5                      | 0.241       | 0.041       |
|                   | 457-474       | 469-474       | -20.5                      | 0.193       | 0.204       |
|                   | 7651-7665     | 7660-7665     | -16.2                      | 0.154       | 0.032       |
|                   | 1455-1476     | 1471-1476     | -17.9                      | 0.305       | 0.144       |
| <b>Tet2 3'UTR</b> | 1587-1621     | 1614-1620     | -23.3                      | 0.375       | 0.13        |
|                   | 525-564       | 557-563       | -28.6                      | 0.417       | 0.463       |
|                   | 1032-1061     | 1055-1061     | -19                        | 0.465       | 0.456       |
|                   | 367-405       | 398-404       | -25                        | 0.203       | 0.268       |
|                   | 1129-1168     | 1161-1167     | -20.8                      | 0.333       | 0.07        |

**Supplementary Table S2. Modified output table of STarMiR analysis.**

Free energy in kcal/mol ( $\Delta G_{\text{hybrid}}$ ) analysis of putative miR-29b binding site to each *Tet* 3'UTR, and measure of the structural accessibility in the predicted binding site (Site Access) or in the target sub-region complementary to the miRNA seed (Seed Access) as defined by STarMir<sup>3</sup>. Highlighted rows are conserved miR-29b binding sites as predicted by TargetScanMouse<sup>1</sup> (S1 Table).

| <b>Genes</b>           | <b>Forward primer (5'→3')</b> | <b>Reverse primer (5'→3')</b> |
|------------------------|-------------------------------|-------------------------------|
| <i>Tubd1</i>           | TCTCTTGCTAACTTGGTGGTCCTC      | GCTGGGTCTTTAAATCCCTCTACG      |
| <i>Hprt1</i>           | GTTGGGCTTACCTCACTGCTTTC       | CCTGGTTCATCATCGCTAATCACG      |
| <i>Actb</i>            | CAACGGCTCCGGCATGTGC           | CTCTTGCTCTGGGCCTCG            |
| <i>Gapdh</i>           | CAGCAATGCATCCTGCACC           | TGGAAGTGTGGTCATGAGCCC         |
| <i>Tet1</i>            | TTGCTGGAGACTGTCCGACTTGG       | TGCTCGAATCAACGTACACACCAC      |
| <i>Tet2</i>            | TGCCAAATGGCAGTACAGTGGTG       | ATCCTCAGGCTTAGCTCCGACTTC      |
| <i>Tet3</i>            | GCATCGGGCAGGCCACCATT          | GGCAAGCACAGGTCCGGTCA          |
| <i>Dnmt3a</i>          | CAGCTGCTTACGCCCCACCC          | CACCAGCCGCTCCCTTGTGC          |
| <i>Dnmt3b</i>          | AAAGCCCGGCTGTCCGAACC          | CCCTGCCGACCTCGGGTGAT          |
| <i>Dnmt1</i>           | AGTCTGTTCTGTGCAGAAGGC         | TGCTGAAGAAGCCATCCCACTC        |
| <i>Fos</i>             | ACAGATACACTCCAAGCGGAGAC       | TGGCAATCTCAGTCTGCAACGC        |
| <i>Drosha</i>          | CATCACGAAGGACACTTGACGTTG      | TGCTACCTTGGCTTGC GTTCTG       |
| <i>Dgcr8</i>           | GTCACCTGGTCCAGACCCTACTTC      | GCTTAGAGGAGGATCATGTTTCCG      |
| <i>Dicer</i>           | TCTTCGAG CTCCATTGTTGGTC       | CTACCACTCTTTACCAACCG          |
| <i>Ddx5</i>            | ACCATTGACGCCATGTCCGAG         | CAAATCGAGGTGCACCAAACCC        |
| <i>Ddx17</i>           | AGGGATATGGTTGGCATTGCACAG      | CAATCGCAGGCAGCAAATACGC        |
| <i>p53</i>             | CACGTACTCTCCTCCCCTCAAT        | AACTGCACAGGGCACGTCTT          |
| <i>Notch 1</i>         | ACAGTGCAACCCCTGTATG           | TCTAGGCCATCCCACTCACA          |
| <i>Notch 2</i>         | ACAGTGTGGCTCCCTGTTC           | ATCGTTTACCTTGCCAGCCA          |
| <i>Khdrbs1</i>         | TTATGGCCCATGCTATGGAAGA        | AGGTACTCCGTTCAAGTAGGAC        |
| <i>Elk1</i>            | CTGCTCCCCACACATACCTT          | GAGAGGCCATCCACACTGAT          |
| <i>Elk4</i>            | ATCTAACAATGGGGAGTTCAAGC       | GGCTCGGCTGAGTTTATCATAAT       |
| <i>Gadd45a</i>         | TGC GAG AAC GAC ATC AAC AT    | TCC CGG CAA AAA CAA ATA AG    |
| <i>Gadd45b</i>         | CTGCCTCCTGGTCACGAA            | TTGCCTCTGCTCTCTTCAACA         |
| <i>Tdg</i>             | TAGGAAACGTGCGTGTTTCAG         | CTCATACTGCCAAACCAGCA          |
| <i>Crebbp</i>          | TGGAGTGAACCCCAAGTTAG          | TTGCTTGCTCTCGTCTCTGA          |
| <i>Creb1</i>           | AGCTGCCACTCAGCCGGGTA          | TCCGCTGAGGCAGCTTGAACA         |
| <b>miRNAs</b>          | <b>Source</b>                 |                               |
| <i>miR-29b-1</i>       | Qiagen, cat. No.: MS00005936  |                               |
| <i>miR-29a</i>         | Qiagen, cat. No.: MS00001372  |                               |
| <i>miR-29c</i>         | Qiagen, cat. No.: MS00001379  |                               |
| <i>miR-10b</i>         | Qiagen, cat. No.: MS00032249  |                               |
| <i>miR-182</i>         | Qiagen, cat. No.: MS00011291  |                               |
| <i>Snord61_11</i>      | Qiagen, cat. No.:MS00033705   |                               |
| <i>Rnu6</i>            | Qiagen, cat. No.: MS00033740  |                               |
| <i>Pre-miR-29b-1</i>   | Qiagen, cat. No.: MP00005355  |                               |
| <i>Pre-miR-29a</i>     | Qiagen, cat. No.: MP00005348  |                               |
| <i>Pre-miR-29c</i>     | Qiagen, cat. No.: MP00005369  |                               |
| <i>Pre-miR-10b</i>     | Qiagen, cat. No.: MP00003983  |                               |
| <i>Pre-miR-182</i>     | Qiagen, cat. No.: MP00004431  |                               |
| <i>Pri-miR-29a/b-1</i> | AACTATTGCACGGACTTCACCT        | TCCTGAAGAAGCTTTGTCGTC         |

**Supplementary Table S3. List of primers used for the quantification of mRNA and miRNA transcripts.**

| <b>Name</b>     | <b>Forward primer (5'→3')</b> | <b>Reverse primer (5'→3')</b> |
|-----------------|-------------------------------|-------------------------------|
| <i>Tet1 (1)</i> | AATGCCTTTGCTAATGTGGTG         | TTAGCGAACAGCTTCCAACC          |
| <i>Tet1 (2)</i> | AGGAAAATGGGAACCCAAAC          | TGAGGGAGGATTTCTGATGG          |
| <i>Tet2 (1)</i> | AATGCCTTTGCTAATGTGGTG         | TTAGCGAACAGCTTCCAACC          |
| <i>Tet2 (2)</i> | TCGGCTGATGAGCAGTATCA          | AGCAATCTGGGTAGCACCAT          |
| <i>Tet3 (1)</i> | TTTAAAGAAACAGTAGTTTGCAGAGC    | TATCATACCCTCATGGAATCTAAGTT    |
| <i>Tet3 (2)</i> | GCTCTTCTCGTCCCGTTGAT          | TAGAGCCACGTGCTAACTGC          |
| <i>Dnmt3a</i>   | TTGGCCTTGCAAAGGGTTG           | TTGCACGCGAGTCTGGATAA          |

**Supplementary Table S4. List of primers used for cloning**

**Supplementary Table S5.** Numerical data and statistical analysis used in all figures.

## References

- 1 Lewis, B. P., Burge, C. B. & Bartel, D. P. Conserved seed pairing, often flanked by adenosines, indicates that thousands of human genes are microRNA targets. *Cell* **120**, 15-20, doi:10.1016/j.cell.2004.12.035 (2005).
- 2 Friedman, R. C., Farh, K. K., Burge, C. B. & Bartel, D. P. Most mammalian mRNAs are conserved targets of microRNAs. *Genome research* **19**, 92-105, doi:10.1101/gr.082701.108 (2009).
- 3 Ding, Y., Chan, C. Y. & Lawrence, C. E. Sfold web server for statistical folding and rational design of nucleic acids. *Nucleic Acids Res* **32**, 135-141, doi:10.1093/nar/gkh449 (2004).
